# Supplementary material
Source: Springer Nature journal article supplement (https://www.springermedizin.de/resource/supplementary/12889_2011_3618_MOESM1_ESM.pdf/9489528)
Supplement: MOESM1 [file 9489528]

**758** Employees according to payroll

169 Non-responders to screening

**589 (78%)** Responders to screening

195 Non-consenters

**Baseline measurement**

**394 (52%)** Employees consent to participate

**31 Drop-out**

24 no reason  
1 Long term sick  
3 Empl. ceased  
3 no contact

**363 (48%)** Participants

**120 Physical coordination training**

**95 females**

Baseline observations:  
80 Neck pain  
82 Shoulder pain  
83 Neck/shoulder pain  
82 Low back pain  
80 Work ability  
90 Sickness absence

**43 drop out:**

18 no reason  
9 Empl ceased  
5 Lack time  
4 Long term sick  
1 pregnant  
2 new work tasks  
1 fam issues  
1 own treatment  
2 leave

**52 females**

1-yr FU observations:  
41 Neck pain  
41 Shoulder pain  
41 Neck/shoulder pain  
41 Low back pain  
39 Work ability  
90 Sickness absence

**121 Cognitive behavioural training**

**99 females**

Baseline observations:  
93 Neck pain  
92 Shoulder pain  
93 Neck/shoulder pain  
92 Low back pain  
88 Work ability  
96 Sickness absence

**52 drop out:**

25 no reason  
9 Empl ceased  
8 Lack time  
3 Long term sick  
2 pregnant  
5 new work tasks

**47 females**

1-yr FU observations:  
42 Neck pain  
40 Shoulder pain  
42 Neck/shoulder pain  
41 Low back pain  
41 Work ability  
96 Sickness absence

**122 Reference**

**100 females**

Baseline observations:  
84 Neck pain  
84 Shoulder pain  
83 Neck/shoulder pain  
82 Low back pain  
81 Work ability  
89 Sickness absence

**46 drop out:**

20 no reason  
14 Empl ceased  
2 Lack time  
7 Long term sick  
1 pregnant  
1 fam issues  
1 leave

**54 females**

1-yr FU observations:  
51 Neck pain  
52 Shoulder pain  
53 Neck/shoulder pain  
52 Low back pain  
52 Work ability  
89 Sickness absence
